# Supplementary material for: RabA2b Overexpression Alters the Plasma-Membrane Proteome and Improves Drought Tolerance in Arabidopsis
Source: Front Plant Sci. 2021 Oct 6;12:738694. doi: 10.3389/fpls.2021.738694 (PMC8526897; doi:10.3389/fpls.2021.738694)
Supplement: Supplementary file 4 [file Data_Sheet_6.xlsx]

## Sheet: Table S6- decreased abundance 
Supplementary table S6- List of identified protein with decreased abundance , corresponding TAIR ID, Log2FC value in the overexpressor line and details of the peptides identified.
Protein IDs	Majority protein IDs	TAIR annotation	Protein names	Gene names	fold change in OE 6.4	p is the p-value determined from Student's t-test (6.4 and wt)	fold change in OE 11.4	p is the p-value determined from Student's t-test (11.4 and wt)	Mol. weight [kDa]	Fasta headers	Number of proteins	Razor + unique peptides	Razor + unique peptides OE_11.4_replicate_1	Razor + unique peptides OE_11.4_replicate_2	Razor + unique peptides OE_11.4_replicate_3	Razor + unique peptides OE_6.4_replicate_1	Razor + unique peptides OE_6.4_replicate_2	Razor + unique peptides OE_6.4_replicate_3	Razor + unique peptides WT_relicate_1	Razor + unique peptides WT_relicate_2	Razor + unique peptides WT_relicate_3	Unique peptides OE_11.4_replicate_1	Unique peptides OE_11.4_replicate_2	Unique peptides OE_11.4_replicate_3	Unique peptides OE_6.4_replicate_1	Unique peptides OE_6.4_replicate_2	Unique peptides OE_6.4_replicate_3	Unique peptides WT_relicate_1	Unique peptides WT_relicate_2	Unique peptides WT_relicate_3	Mol. weight [kDa]	Sequence length	Sequence lengths	Score	Identification type OE_11.4_replicate_1	Identification type OE_11.4_replicate_2	Identification type OE_11.4_replicate_3	Identification type OE_6.4_replicate_1	Identification type OE_6.4_replicate_2	Identification type OE_6.4_replicate_3	Identification type WT_relicate_1	Identification type WT_relicate_2	Identification type WT_relicate_3	Sequence coverage OE_11.4_replicate_1 [%]	Sequence coverage OE_11.4_replicate_2 [%]	Sequence coverage OE_11.4_replicate_3 [%]	Sequence coverage OE_6.4_replicate_1 [%]	Sequence coverage OE_6.4_replicate_2 [%]	Sequence coverage OE_6.4_replicate_3 [%]
P15456	P15456	AT1G03880	12S seed storage protein CRB	CRB	-0.962523	0.0172874	-1.58792	0.0161503	50.558	>sp|P15456|CRU2_ARATH 12S seed storage protein CRB OS=Arabidopsis thaliana (Mouse-ear cress) OX=3702 GN=CRB PE=1 SV=2	1	12	7	8	6	9	8	9	8	9	10	7	8	6	9	8	9	8	9	10	50.558	455	455	317.8	By MS/MS	By MS/MS	By MS/MS	By MS/MS	By MS/MS	By MS/MS	By MS/MS	By MS/MS	By MS/MS	24	26.8	21.1	29.5	26.8	31
O04834;O80489;Q3E6Q4	O80489	AT1G09180	Putative GTP-binding protein, SAR1B	SARB1	-2.39602	0.0331961	-1.27295	0.0336573	21.96	>tr|O80489|O80489_ARATH Putative GTP-binding protein, SAR1B OS=Arabidopsis thaliana (Mouse-ear cress) OX=3702 GN=ATSAR1 PE=2 SV=1	3	2	2	2	2	2	2	1	2	2	2	2	2	2	2	2	1	2	2	2	22.03	193	193;193;122	119.7	By MS/MS	By MS/MS	By MS/MS	By matching	By matching	By matching	By matching	By MS/MS	By MS/MS	64.8	59.1	59.1	59.1	59.1	58.5
Q9LM16	Q9LM16	AT1G22200	Endoplasmic reticulum vesicle transporter protein	TAIR:locus:2015056	-3.36174	0.017657	-3.36174	0.00357073	43.797	>tr|Q9LM16|Q9LM16_ARATH Endoplasmic reticulum vesicle transporter protein OS=Arabidopsis thaliana (Mouse-ear cress) OX=3702 GN=TAIR:locus:2015056 PE=2 SV=1	1	2	1	0	0	1	0	0	1	1	1	1	0	0	1	0	0	1	1	1	43.797	386	386	2.0026	By MS/MS	By matching	By matching	By matching	By matching	By matching	By matching	By matching	By MS/MS	10.1	0	0	3.1	0	0
P33207	P33207	AT1G24360	3-oxoacyl-[acyl-carrier-protein] reductase, chloroplastic	TAIR:locus:2024021	-4.09333	0.000299902	-4.09333	0.000299902	33.548	>sp|P33207|FABG_ARATH 3-oxoacyl-[acyl-carrier-protein] reductase, chloroplastic OS=Arabidopsis thaliana (Mouse-ear cress) OX=3702 GN=TAIR:locus:2024021 PE=1 SV=2	1	3	2	1	2	2	1	3	2	3	1	2	1	2	2	1	3	2	3	1	33.548	319	319	3.144	By MS/MS	By matching	By MS/MS	By MS/MS	By matching	By MS/MS	By matching	By matching	By MS/MS	5.3	2.8	6.6	5.3	2.8	9.4
Q9FYL1	Q9FYL1	AT1G24530	WD_REPEATS_REGION domain-containing protein	TAIR:locus:2024031	-1.4074	0.0356064	-1.02633	0.0527977	45.944	>tr|Q9FYL1|Q9FYL1_ARATH WD_REPEATS_REGION domain-containing protein OS=Arabidopsis thaliana (Mouse-ear cress) OX=3702 GN=TAIR:locus:2024031 PE=2 SV=1	1	2	1	1	2	1	1	2	2	1	2	1	1	2	1	1	2	2	1	2	45.944	418	418	38.313	By matching	By matching	By matching	By matching	By matching	By matching	By MS/MS	By MS/MS	By MS/MS	4.5	4.5	6.7	4.5	2.2	6.7
Q9SII9	Q9SII9	AT2G17190	Ubiquitin domain-containing protein DSK2a	DSK2A	-3.36123	0.00320684	-3.36123	0.00320684	57.285	>sp|Q9SII9|DSK2A_ARATH Ubiquitin domain-containing protein DSK2a OS=Arabidopsis thaliana (Mouse-ear cress) OX=3702 GN=DSK2A PE=1 SV=2	1	2	1	1	0	1	1	0	2	1	1	1	1	0	1	1	0	2	1	1	57.285	538	538	5.3703	By MS/MS	By matching	By matching	By matching	By MS/MS	By matching	By MS/MS	By MS/MS	By MS/MS	11.7	11.7	7.4	11.7	10.2	7.4
O04921	O04921	AT2G30390	Ferrochelatase-2, chloroplastic	FC2	-4.52665	2.59804e-05	-4.52665	0.000931797	56.618	>sp|O04921|HEMH2_ARATH Ferrochelatase-2, chloroplastic OS=Arabidopsis thaliana (Mouse-ear cress) OX=3702 GN=FC2 PE=1 SV=1	1	3	0	2	1	1	1	1	1	2	2	0	2	1	1	1	1	1	2	2	56.618	512	512	7.5147	By matching	By matching	By MS/MS	By matching	By matching	By matching	By matching	By matching	By MS/MS	0	4.7	2.3	2.3	2.3	2.3
O82533	O82533	AT2G36250	Cell division protein FtsZ homolog 2-1, chloroplastic	FTSZ2-1	-3.73461	0.00237721	-3.73461	0.000240745	50.721	>sp|O82533|FTZ21_ARATH Cell division protein FtsZ homolog 2-1, chloroplastic OS=Arabidopsis thaliana (Mouse-ear cress) OX=3702 GN=FTSZ2-1 PE=1 SV=2	2	3	1	0	0	1	2	1	1	1	1	1	0	0	1	2	1	1	1	1	50.721	478	478;473	3.9763	By MS/MS	By matching	By matching	By MS/MS	By MS/MS	By MS/MS	By MS/MS	By matching	By matching	2.9	0	0	2.9	8.6	2.9
Q84TF0	Q84TF0	AT2G37790	Aldo-keto reductase family 4 member C10	AKR4C10	-4.26706	0.00549327	-4.26706	0.00549327	34.913	>sp|Q84TF0|AKRCA_ARATH Aldo-keto reductase family 4 member C10 OS=Arabidopsis thaliana (Mouse-ear cress) OX=3702 GN=AKR4C10 PE=1 SV=1	1	2	0	1	0	0	2	0	0	2	2	0	1	0	0	2	0	0	2	2	34.913	314	314	1.7195	By matching	By matching	By matching	By matching	By matching	By matching	By matching	By MS/MS	By matching	3.2	5.7	3.2	3.2	8.3	3.2
F4J2K4	F4J2K4	AT3G10180	Kinesin-like protein KIN-7O	KIN7O	-3.55192	0.0188053	-3.55192	0.0188053	144.76	>sp|F4J2K4|KN7O_ARATH Kinesin-like protein KIN-7O OS=Arabidopsis thaliana (Mouse-ear cress) OX=3702 GN=KIN7O PE=3 SV=1	1	2	0	0	0	0	1	0	1	0	1	0	0	0	0	1	0	1	0	1	144.76	1273	1273	1.9104	By matching	By matching	By matching	By matching	By MS/MS	By matching	By matching	By matching	By MS/MS	0	0	0	0	0.6	0
Q96283	Q96283	AT3G46830	Ras-related protein RABA2c	RABA2C	-1.48917	0.000681989	-0.694731	0.0328456	23.849	>sp|Q96283|RAA2C_ARATH Ras-related protein RABA2c OS=Arabidopsis thaliana (Mouse-ear cress) OX=3702 GN=RABA2C PE=2 SV=4	1	6	5	4	4	2	2	3	4	5	5	5	4	4	2	2	3	4	4	4	23.849	217	217	83.179	By MS/MS	By MS/MS	By MS/MS	By matching	By matching	By MS/MS	By MS/MS	By MS/MS	By MS/MS	50.2	40.6	43.3	29	29	35
Q9LXJ2	Q9LXJ2	AT3G52730	Cytochrome b-c1 complex subunit 9, mitochondrial	QCR9	-5.82406	0.000641903	-5.82406	0.0049408	8.4485	>sp|Q9LXJ2|QCR9_ARATH Cytochrome b-c1 complex subunit 9, mitochondrial OS=Arabidopsis thaliana (Mouse-ear cress) OX=3702 GN=QCR9 PE=1 SV=1	1	2	1	0	0	0	0	0	1	1	2	1	0	0	0	0	0	1	1	2	8.4485	72	72	32.009	By MS/MS	By matching	By matching	By matching	By matching	By matching	By matching	By MS/MS	By MS/MS	20.8	0	0	0	0	0
Q8W0Z9	Q8W0Z9	AT3G58560	Carbon catabolite repressor protein 4 homolog 1	CCR4-1	-2.44443	0.0146483	-2.44443	0.0146483	66.76	>sp|Q8W0Z9|CCR4A_ARATH Carbon catabolite repressor protein 4 homolog 1 OS=Arabidopsis thaliana (Mouse-ear cress) OX=3702 GN=CCR4-1 PE=2 SV=1	1	2	0	0	0	0	1	1	0	1	1	0	0	0	0	1	1	0	1	1	66.76	602	602	3.9515	By matching	By matching	By matching	By matching	By MS/MS	By matching	By matching	By matching	By MS/MS	0	0	0	0	2.2	2.2
Q9LZH9	Q9LZH9	AT3G62870	60S ribosomal protein L7a-2	RPL7AB	-5.18029	0.000596376	-5.18029	0.000596376	29.034	>sp|Q9LZH9|RL7A2_ARATH 60S ribosomal protein L7a-2 OS=Arabidopsis thaliana (Mouse-ear cress) OX=3702 GN=RPL7AB PE=2 SV=1	1	2	1	1	2	0	1	0	1	2	1	1	1	2	0	1	0	1	2	1	29.034	256	256	6.9819	By MS/MS	By MS/MS	By MS/MS	By matching	By MS/MS	By matching	By MS/MS	By MS/MS	By matching	31.6	31.6	35.9	26.6	31.6	26.6
Q9ZST4	Q9ZST4	AT4G01900	Nitrogen regulatory protein P-II homolog	GLB1	-1.21675	0.0885469	-0.28737	0.0432053	21.275	>sp|Q9ZST4|GLNB_ARATH Nitrogen regulatory protein P-II homolog OS=Arabidopsis thaliana (Mouse-ear cress) OX=3702 GN=GLB1 PE=1 SV=1	1	4	4	4	2	3	1	4	3	4	3	4	4	2	3	1	4	3	4	3	21.275	196	196	11.55	By MS/MS	By MS/MS	By MS/MS	By matching	By matching	By matching	By MS/MS	By MS/MS	By MS/MS	23	23	11.2	18.4	5.6	23
O04834;O80489;Q3E6Q3	O04834	AT4G02080	GTP-binding protein SAR1A	SAR1A;ATSAR1	-2.39602	0.0331961	-1.27295	0.0336573	22.03	>sp|O04834|SAR1A_ARATH GTP-binding protein SAR1A OS=Arabidopsis thaliana (Mouse-ear cress) OX=3702 GN=SAR1A PE=2 SV=1;	3	2	2	2	2	2	2	1	2	2	2	2	2	2	2	2	1	2	2	2	22.03	193	193;193;122	119.7	By MS/MS	By MS/MS	By MS/MS	By matching	By matching	By matching	By matching	By MS/MS	By MS/MS	64.8	59.1	59.1	59.1	59.1	58.5
Q41932	Q41932	AT4G05180	Oxygen-evolving enhancer protein 3-2, chloroplastic	PSBQ2	-1.36501	0.0432192	-1.85421	0.00588662	24.643	>sp|Q41932|PSBQ2_ARATH Oxygen-evolving enhancer protein 3-2, chloroplastic OS=Arabidopsis thaliana (Mouse-ear cress) OX=3702 GN=PSBQ2 PE=1 SV=2	1	12	5	9	8	7	8	7	12	12	11	5	9	8	7	8	7	12	12	11	24.643	230	230	105.41	By MS/MS	By MS/MS	By MS/MS	By MS/MS	By MS/MS	By MS/MS	By MS/MS	By MS/MS	By MS/MS	34.8	46.5	45.7	42.6	45.7	38.7
Q5XEV6	Q5XEV6	AT4G24090	At4g24090	TAIR:locus:2135011	-3.90564	0.00734238	-3.90564	0.0398735	33.64	>tr|Q5XEV6|Q5XEV6_ARATH At4g24090 OS=Arabidopsis thaliana (Mouse-ear cress) OX=3702 GN=TAIR:locus:2135011 PE=2 SV=1	1	2	0	0	1	0	0	0	0	1	2	0	0	1	0	0	0	0	1	2	33.64	308	308	3.9039	By matching	By matching	By matching	By matching	By matching	By matching	By matching	By matching	By MS/MS	0	0	4.9	0	0	0
Q9SW33	Q9SW33	AT4G24930	Thylakoid lumenal 17.9 kDa protein, chloroplastic	TAIR:locus:2117268	-2.60633	0.0449924	-1.49157	0.00513166	24.695	>sp|Q9SW33|TL1Y_ARATH Thylakoid lumenal 17.9 kDa protein, chloroplastic OS=Arabidopsis thaliana (Mouse-ear cress) OX=3702 GN=TAIR:locus:2117268 PE=1 SV=1	1	2	1	1	0	1	0	1	2	2	2	1	1	0	1	0	1	2	2	2	24.695	225	225	3.8625	By MS/MS	By MS/MS	By matching	By matching	By matching	By matching	By MS/MS	By MS/MS	By MS/MS	4.9	4.9	0	4.9	0	4.9
P15459	P15459	AT4G27160	2S seed storage protein 3	AT2S3	-0.981564	0.0211963	-2.1608	0.00384483	18.762	>sp|P15459|2SS3_ARATH 2S seed storage protein 3 OS=Arabidopsis thaliana (Mouse-ear cress) OX=3702 GN=AT2S3 PE=1 SV=1	1	4	4	3	2	4	4	3	4	4	4	2	1	0	2	2	1	2	2	2	18.762	164	164	94.48	By MS/MS	By MS/MS	By MS/MS	By MS/MS	By MS/MS	By MS/MS	By MS/MS	By MS/MS	By MS/MS	29.9	22.6	18.3	29.9	29.9	25.6
P15460	P15460	AT4G27170	2S seed storage protein 4	AT2S4	-1.34845	0.0230707	-2.40958	0.00202023	19.169	>sp|P15460|2SS4_ARATH 2S seed storage protein 4 OS=Arabidopsis thaliana (Mouse-ear cress) OX=3702 GN=AT2S4 PE=2 SV=1	1	6	5	5	4	5	6	5	6	6	6	4	4	3	4	4	3	4	4	4	19.169	166	166	108.34	By MS/MS	By MS/MS	By MS/MS	By MS/MS	By MS/MS	By MS/MS	By MS/MS	By MS/MS	By MS/MS	28.3	28.3	22.9	28.3	28.3	27.7
Q96318	Q96318	AT4G28520	12S seed storage protein CRC	CRC	-0.920066	0.0557603	-2.16203	0.00447046	58.235	>sp|Q96318|CRU3_ARATH 12S seed storage protein CRC OS=Arabidopsis thaliana (Mouse-ear cress) OX=3702 GN=CRC PE=1 SV=1	1	26	22	18	23	21	22	22	25	25	23	22	18	23	21	22	22	25	25	23	58.235	524	524	323.31	By MS/MS	By MS/MS	By MS/MS	By MS/MS	By MS/MS	By MS/MS	By MS/MS	By MS/MS	By MS/MS	59.4	45.6	65.1	62.6	58.4	57.1
C6KIE6	C6KIE6	AT4G34390	Extra-large guanine nucleotide-binding protein 2	XLG2	-4.03516	0.000716798	-4.03516	0.000716798	97.182	>sp|C6KIE6|XLG2_ARATH Extra-large guanine nucleotide-binding protein 2 OS=Arabidopsis thaliana (Mouse-ear cress) OX=3702 GN=XLG2 PE=1 SV=1	1	3	2	0	0	0	1	1	1	1	1	2	0	0	0	1	1	1	1	1	97.182	861	861	4.0457	By MS/MS	By matching	By matching	By matching	By matching	By MS/MS	By matching	By matching	By MS/MS	2.3	0	0	0	0.9	2.1
F4JQG6	F4JQG6	AT4G36700	Vicilin-like seed storage protein At4g36700	TAIR:locus:2115390	-4.21696	0.000831051	-4.21696	5.9039e-05	59.084	>sp|F4JQG6|VCL43_ARATH Vicilin-like seed storage protein At4g36700 OS=Arabidopsis thaliana (Mouse-ear cress) OX=3702 GN=TAIR:locus:2115390 PE=3 SV=1	1	2	0	0	1	0	0	1	1	1	2	0	0	1	0	0	1	1	1	2	59.084	522	522	11.609	By matching	By matching	By MS/MS	By matching	By matching	By MS/MS	By matching	By MS/MS	By MS/MS	0	0	2.9	0	0	2.9
Q9LF21	Q9LF21	AT5G15610	Eukaryotic translation initiation factor 3 subunit M	TAIR:locus:2180917	-4.52164	0.00247795	-4.52164	0.000112712	49.767	>tr|Q9LF21|Q9LF21_ARATH Eukaryotic translation initiation factor 3 subunit M OS=Arabidopsis thaliana (Mouse-ear cress) OX=3702 GN=TAIR:locus:2180917 PE=1 SV=1	1	2	0	0	0	0	1	0	0	1	2	0	0	0	0	1	0	0	1	2	49.767	442	442	7.0555	By matching	By matching	By matching	By matching	By MS/MS	By matching	By matching	By MS/MS	By MS/MS	1.6	1.6	1.6	1.6	6.3	1.6
P15455	P15455	AT5G44120	12S seed storage protein CRA1	CRA1	-0.983682	0.0170317	-1.7375	0.000896872	52.594	>sp|P15455|CRU1_ARATH 12S seed storage protein CRA1 OS=Arabidopsis thaliana (Mouse-ear cress) OX=3702 GN=CRA1 PE=1 SV=2	1	22	17	15	15	19	18	19	20	20	21	16	14	14	18	17	18	19	19	20	52.594	472	472	323.31	By MS/MS	By MS/MS	By MS/MS	By MS/MS	By MS/MS	By MS/MS	By MS/MS	By MS/MS	By MS/MS	45.8	39.2	44.1	49.2	49.2	49.2
Q9FGK9	Q9FGK9	AT5G47480	Protein transport protein SEC16A homolog	MAG5	-4.01514	0.000357548	-4.01514	0.000357548	145.88	>sp|Q9FGK9|MAG5_ARATH Protein transport protein SEC16A homolog OS=Arabidopsis thaliana (Mouse-ear cress) OX=3702 GN=MAG5 PE=1 SV=1	1	2	2	0	1	2	1	0	2	2	1	2	0	1	2	1	0	2	2	1	145.88	1350	1350	1.7362	By MS/MS	By matching	By MS/MS	By MS/MS	By MS/MS	By matching	By matching	By MS/MS	By matching	1.6	0	0.7	1.6	0.7	0
Q9FDX6	Q9FDX6	AT5G49480	Calcium-binding protein CP1	CP1	-2.73063	9.21949e-06	-2.73063	2.55637e-08	17.211	>sp|Q9FDX6|CP1_ARATH Calcium-binding protein CP1 OS=Arabidopsis thaliana (Mouse-ear cress) OX=3702 GN=CP1 PE=2 SV=1	1	2	0	0	0	0	1	0	2	1	0	0	0	0	0	1	0	2	1	0	17.211	160	160	2.9054	By matching	By matching	By matching	By matching	By matching	By matching	By MS/MS	By MS/MS	By matching	0	0	0	0	5.6	0
[truncated: 34 more columns]
